# Supplementary material for: Designing and describing an electronic referral system to facilitate direct hospital admissions
Source: Springer Nature journal article supplement (doi:10.1186/s12875-022-01656-4), 2022-03-28
Supplement: MOESM1 [file 20259514]

1  
2  
3  
4  
5  
6  
7  
8  
9  
10  
11  
12  
13  
14  
15  
16  
17  
18  
19  
20  
21  
22

## Additional files

### **Additional file 1: Focus on the coordination territory of Hauts-de-Seine Sud (Ile-de-France, France)**

The Hauts-de-Seine Sud corresponds to an administrative coordination territory (92-Sud) defined by the regional authorities. This territory is composed of the following 15 municipalities: Antony, Clamart, Bagneux, Bourg la reine, Chatenay-Malabry, Chatillon, Fontenay aux Roses, Issy les Moulinaux, Le Plessis Robinson, Malakoff, Meudon, Meudon la Forêt, Montrouge, Sceaux, Vanves.

URL link: [https://www.ors-idf.org/fileadmin/DataStorageKit/ORS/Etudes/2019/territoireCoordination/92\\_sud\\_2019.pdf](https://www.ors-idf.org/fileadmin/DataStorageKit/ORS/Etudes/2019/territoireCoordination/92_sud_2019.pdf)

### **Antoine-Béclère Hospital**

Antoine-Béclère Hospital is a hospital of the Assistance Publique - Hôpitaux de Paris (AP-HP) and is the only public medical-surgical-obstetrical establishment in its territory. Other details are as follows:

- It is located in the town of Clamart in the Hauts-de-Seine Sud region;
- It has 1 adult and 1 paediatric emergency department, 6 hospitalization departments, 1 neonatal intensive care unit and 1 adult intensive care unit, and 1 ambulatory medicine and surgery centre;
- It has 389 hospital beds (including 11 beds for short-term hospitalizations < 24 h);
- It had 64,040 emergency room visits in 2018;
- It had 23,297 hospitalizations in 2018; and
- It boasts expertise in medically assisted reproduction and bariatric surgery.

URL link: <http://hopital-antoine-beclere.aphp.fr>

1

## 2 **The University Department of General Medicine Paris-Saclay (DUMG)**

3 The main missions of the DUMG are as follows:

4 - The training of general medicine residents;

5 - Participation in the teaching of 2<sup>nd</sup> cycle medical students and the organization of their internships  
6 in general medicine;

7 - The development of research projects related to primary care; and

8 - Participation in the life of the faculty.

9

10 URL link: [https://www.medecine.universite-paris-saclay.fr/la-faculte/services-](https://www.medecine.universite-paris-saclay.fr/la-faculte/services-administratifs/departement-de-medecine-generale)  
11 [administratifs/departement-de-medecine-generale](https://www.medecine.universite-paris-saclay.fr/la-faculte/services-administratifs/departement-de-medecine-generale)

12

## 13 **The DAC-OSMOSE coordination support structure**

14 DACs are unique legal entities financed by regional health agencies. They are staffed by a  
15 multiprofessional team (doctors, nurses, social workers) to organize the support of health  
16 professionals in the care pathways of patients in complex situations. This support is provided at the  
17 following two levels:

18 1. Individual support for the coordination of care paths:

19 o Information and referral to resources in the territory.

20 o Support for the organization of complex health care pathways (overall assessment of the  
21 person's needs; the development and proposal of a personalized assistance program; the  
22 mobilization, coordination and follow-up of the assistance plan; and the fluidity and  
23 coordination of communication between the stakeholders accompanying the patient).

24 2. Territorial support for the organization of care paths:

1 o Observation of care pathways to analyse the prevention of risks of breakdown.

2 o Coordination of operational cooperation between territorial partners.

3

4 URL link: <http://www.reseau-osmose.fr>

5

6

1 Additional file 2: Screenshots of the French SIPILINK e-form for requests from primary care physicians

**Demande**

**Nature de la demande \***  
 Hospitalisation conventionnelle  Hospitalisation de jour  Avis

**Spécialité Hospitalière \***  
Médecine interne (oncologie, diabétologie, infectiologie) x ▾

**Type de demande \***  
Altération de l'état général x ▾

**Délai de réponse souhaité \***  
Dans les 48 heures x ▾

Adressage à un médecin hospitalier spécifique, préciser le nom et le prénom du praticien  
[Redacted]

2

**Patient**

|                                                                                     |                                             |
|-------------------------------------------------------------------------------------|---------------------------------------------|
| <b>Nom *</b><br>[Redacted]                                                          | <b>Nom et numéro de voie</b><br>[Redacted]  |
| <b>Prénom *</b><br>[Redacted]                                                       | <b>Code Postal *</b><br>[Redacted]          |
| <b>Date de naissance</b><br>[Redacted] 📅                                            | <b>Ville *</b><br>[Redacted] x ▾            |
| <b>Sexe *</b><br><input type="radio"/> Homme <input checked="" type="radio"/> Femme |                                             |
| <b>numéro de téléphone 1 *</b><br>[Redacted]                                        | <b>Commentaire 1</b><br>Téléphone personnel |
| <b>numéro de téléphone 2</b><br>[Redacted]                                          | <b>Commentaire 2</b><br>[Redacted]          |

3

**détail de la demande**

**Sujet \***  
AEG

Amaigrissement progressif  
Anémie à 8g/dl  
Bilan biologique en Pj

J'ai bien obtenu le consentement de mon patient, et il accepte que ses données soient envoyées \*  
[Lire la note d'information au patient](#)

**Pièce jointe (facultatif)**  
 Aucun fichier sélectionné.  
Formats autorisés : PNG, GIF, TIFF, JPEG et PDF. Taille maximale autorisée : 2 Mo.

4

5

1

Additional file 3: Screenshot of the French SIPILINK hospital dashboard

The screenshot shows a web interface for a hospital dashboard. At the top, there is a navigation bar with a logo on the left and several menu items: 'Calendrier', 'Gestion des demandes', 'Documentation', 'Administration', and 'Bienvenue'. Below the navigation bar, there is a table with columns: 'N°', 'Date', 'Docteur', 'Patient', 'Affectation', and 'Détails'. The table contains three rows of data, each representing a medical request. Each row has a search icon and a dropdown menu on the left. The 'Détails' column for each row provides specific information such as 'Statut', 'Spécialité', 'Motif', 'Adresse spécifique', 'Délai de réponse souhaitée', and 'Temps écoulé depuis la demande'. At the bottom of the table, there is a pagination bar that says 'Affichage de l'élément 1 à 3 sur 3 éléments' and navigation buttons 'Précédent', '1', and 'Suivant'.

2

3

Additional file 4: Screenshots of the French SIPILINK hospital decision e-form

4

The screenshot shows a form for a hospital decision. At the top left, there is a dropdown menu for 'Médicine interne (oncologie, diabétologie, infectiologie):'. To its right, the text 'Altération de l'état général' is displayed. On the top right, there is a 'Statut demande:' field with a dropdown menu set to 'Hospitalisation de jour à organiser'. Below these, there are several input fields: 'Date de création', 'Affectation gestionnaire', 'Téléphone du gestionnaire', 'Délai de réponse souhaitée' (set to 'Dans les 48 heures'), 'Affectation médecin', and 'Téléphone du médecin hospitalier'. There is also a field for 'Adressage à un médecin hospitalier spécifique'. At the bottom, there are two fields: 'Médecin sollicitant:' and 'Patient:'. All input fields contain redacted information.

5

Contacts Décision

Type de prise en charge

Hospitalisation conventionnelle  
 Hospitalisation de jour  
 Consultation externe  
 Urgence  
 Avis sans suite (échange sur SIPILINK)  
 Avis sans suite (échange téléphonique)  
 Autre

Date de programmation Infirmière de coordination

Le plus rapidement possible

Renseignements médicaux (apparaissant dans les demandes d'examens)

Justification de la décision de prise en charge

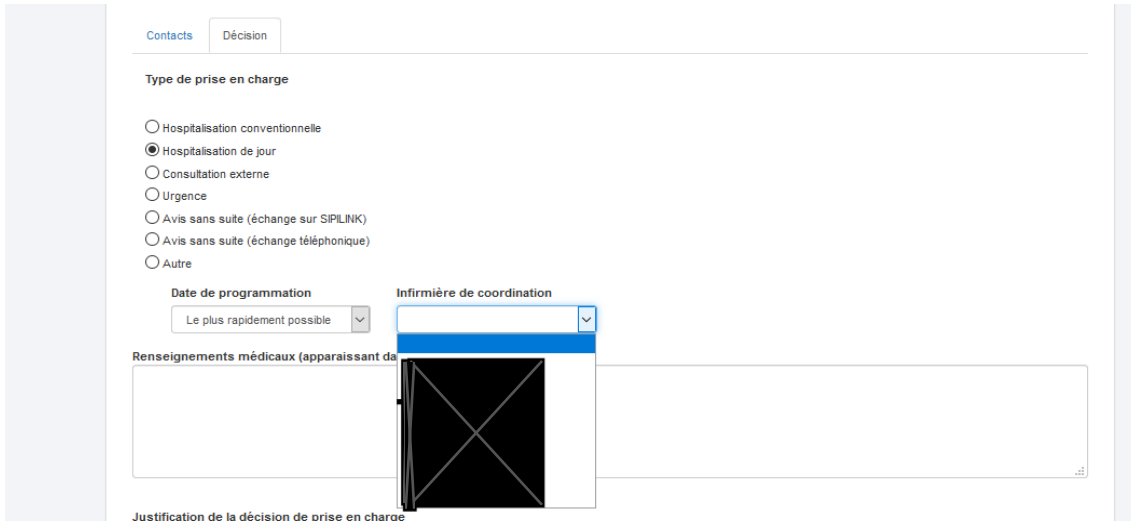A screenshot of a web form titled "Contacts Décision". The form has a tabbed interface with "Contacts" and "Décision" tabs. Under "Type de prise en charge", there are radio buttons for "Hospitalisation conventionnelle", "Hospitalisation de jour" (which is selected), "Consultation externe", "Urgence", "Avis sans suite (échange sur SIPILINK)", "Avis sans suite (échange téléphonique)", and "Autre". Below this are two dropdown menus: "Date de programmation" (set to "Le plus rapidement possible") and "Infirmière de coordination". A large text area for "Renseignements médicaux (apparaissant dans les demandes d'examens)" is partially obscured by a black redaction box with a white 'X'. Below this is another text area for "Justification de la décision de prise en charge".

1

Type de prise en charge

- Hospitalisation conventionnelle  
 Hospitalisation de jour  
 Consultation externe  
 Urgence  
 Avis sans suite (échange sur SIPILINK)  
 Avis sans suite (échange téléphonique)  
 Autre

Date de programmation

Le plus rapidement possible

Infirmière de coordination

A dropdown menu for "Infirmière de coordination" that has been redacted with a black box containing a white 'X'.

Renseignements médicaux (apparaissant dans les demandes d'examens)

|

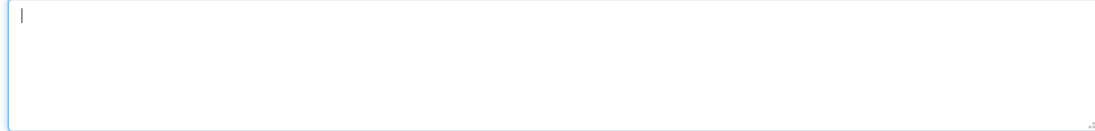A large, empty text area with a blue border, intended for "Renseignements médicaux (apparaissant dans les demandes d'examens)". It contains a single vertical bar character at the beginning.

2

3
